# Supplementary figures and images for: Genome‐wide DNA methylation analyses in lung adenocarcinomas: Association with EGFR, KRAS and TP53 mutation status, gene expression and prognosis
Source: PubMed Central journal article supplement — Mol Oncol. 2015 Nov 6;10(2):330–43. doi: 10.1016/j.molonc.2015.10.021 (PMC5528958; doi:10.1016/j.molonc.2015.10.021), 2015-11-06

# LGALS4 - cg19419519

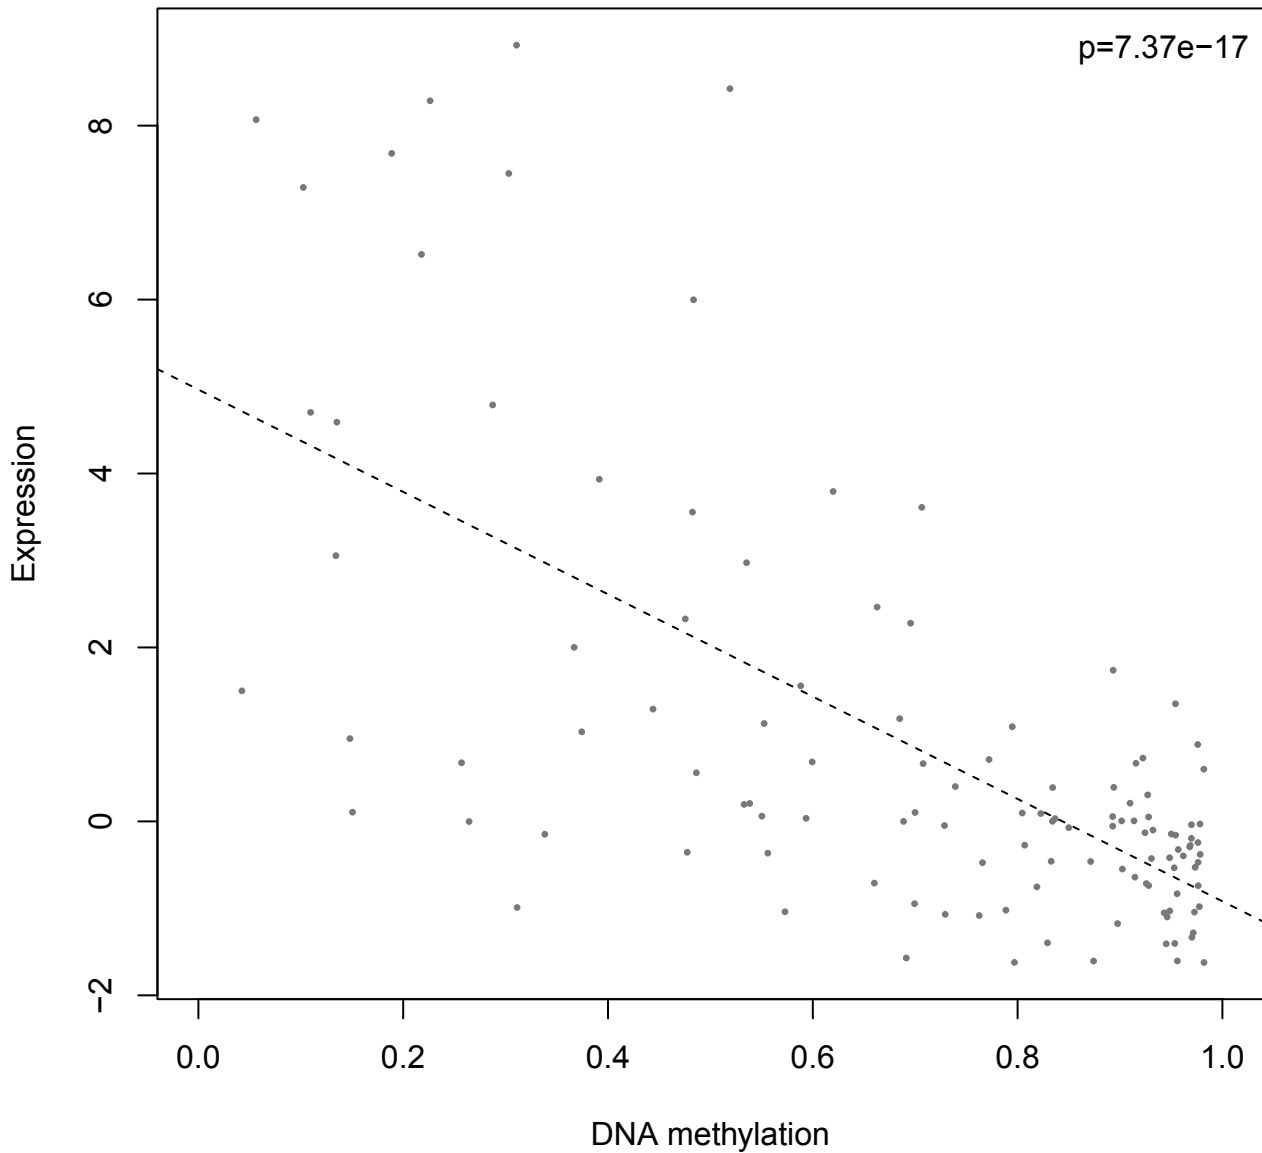

Supplement: MOL2-10-330-s011.pdf [file MOL2-10-330-s011.pdf]
